# Supplementary material for: DNA recognition by Escherichia coli CbpA protein requires a conserved arginine–minor-groove interaction
Source: PubMed Central journal article supplement (PMC4344490; doi:10.1093/nar/gkv012), 2015-02-10
Supplement: supp_gkv012_nar-03482-f-2014-File003.pdf [file supp_gkv012_nar-03482-f-2014-File003.pdf]

## Figure S1

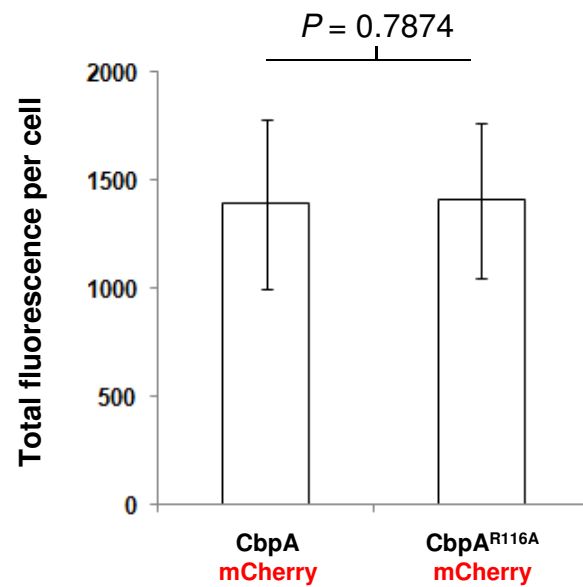

**Figure S1: The R116A substitution does not alter the amount of CbpA mCherry per cell.** A bar chart showing the averaged total fluorescence per cell due to CbpA-mCherry or the R116A derivative. Anova was used to calculate  $P$ .
